# Supplementary material for: Risk Factors for Cancer Mortality in Spain: Population-Based Cohort Study
Source: MDPI journal article supplement (doi:10.3390/ijerph19169852), 2022-08-10
Supplement: s1 [file s1]

**Table S1.** All characteristics of the sample

|                        |                                              | n     | %     |
|------------------------|----------------------------------------------|-------|-------|
| Mortality              | Survived                                     | 19290 | 94.6% |
|                        | Death due to neoplasm                        | 340   | 1.7%  |
|                        | Death from other cause                       | 767   | 3.8%  |
| Autonomous communities | Andalusia                                    | 3659  | 17.9% |
|                        | Aragón                                       | 588   | 2.9%  |
|                        | Asturias                                     | 485   | 2.4%  |
|                        | Balearic Islands                             | 477   | 2.3%  |
|                        | Canary Islands                               | 931   | 4.6%  |
|                        | Cantabria                                    | 263   | 1.3%  |
|                        | Castilla y León                              | 1143  | 5.6%  |
|                        | Castilla-La Mancha                           | 918   | 4.5%  |
|                        | Catalonia                                    | 3068  | 15.0% |
|                        | Valencian Community                          | 2233  | 10.9% |
|                        | Extremadura                                  | 481   | 2.4%  |
|                        | Galicia                                      | 1254  | 6.1%  |
|                        | Madrid                                       | 2804  | 13.7% |
|                        | Murcia                                       | 649   | 3.2%  |
|                        | Navarra                                      | 278   | 1.4%  |
|                        | Basque Country                               | 961   | 4.7%  |
|                        | Rioja                                        | 141   | 0.7%  |
|                        | Ceuta-Melilla                                | 62    | 0.3%  |
| Age group (years)      | < 50                                         | 12015 | 58.9% |
|                        | 50-59                                        | 3106  | 15.2% |
|                        | 60-69                                        | 2393  | 11.7% |
|                        | 70-79                                        | 1767  | 8.7%  |
|                        | ≥ 80                                         | 1115  | 5.5%  |
| Sex                    | Male                                         | 9942  | 48.7% |
|                        | Female                                       | 10455 | 51.3% |
| Social Class           | Social Class I                               | 2185  | 10.7% |
|                        | Social Class II                              | 1498  | 7.3%  |
|                        | Social Class III                             | 3646  | 17.9% |
|                        | Social Class IV                              | 3046  | 14.9% |
|                        | Social Class V                               | 6482  | 31.8% |
|                        | Social Class VI                              | 3003  | 14.7% |
|                        | NA                                           | 538   | 2.6%  |
| Body mass index        | Normal (< 25 kg/m <sup>2</sup> )             | 9019  | 44.2% |
|                        | Overweight (25.0 to < 30 kg/m <sup>2</sup> ) | 6803  | 33.4% |
|                        | Obese (≥ 30 kg/m <sup>2</sup> )              | 3144  | 15.4% |
|                        | NA                                           | 1431  | 7.0%  |
| Country of Birth       | Spain                                        | 17470 | 85.7% |
|                        | Abroad                                       | 2927  | 14.3% |
| Civil status           | Single                                       | 6573  | 32.2% |
|                        | Married                                      | 11398 | 55.9% |
|                        | Widower                                      | 1460  | 7.2%  |
|                        | Separated                                    | 364   | 1.8%  |
|                        | Divorced                                     | 604   | 3.0%  |
| Educational level      | University                                   | 3280  | 16.1% |
|                        | Professional training                        | 3126  | 15.3% |
|                        | Bachelor                                     | 2680  | 13.1% |
|                        | Secondary                                    | 6848  | 33.6% |
|                        | Primary or less                              | 4462  | 21.9% |
| Net monthly income     | NA                                           | 5441  | 26.7% |
|                        | > 2251 €                                     | 3195  | 15.7% |
|                        | 1551-2250 €                                  | 3206  | 15.7% |
|                        | 1051-1550 €                                  | 3765  | 18.5% |
|                        | 801-1050 €                                   | 2077  | 10.2% |
|                        | < 800 €                                      | 2713  | 13.3% |
| Tobacco use            | Never smoker                                 | 10908 | 53.5% |
|                        | Ex-smoker                                    | 3971  | 19.5% |
|                        | Smoker                                       | 5518  | 27.1% |
| Exposure to tobacco    | Never                                        | 16250 | 79.7% |

|                       |                                                             |       |       |
|-----------------------|-------------------------------------------------------------|-------|-------|
|                       | < 1h / day                                                  | 1567  | 7.7%  |
|                       | > 1h / day                                                  | 2581  | 12.7% |
| Alcohol intake        | None                                                        | 10857 | 53.2% |
|                       | Low risk ( $\leq 20$ g/week women and $\leq 40$ g/week men) | 9029  | 44.3% |
|                       | Risky drinking ( $> 20$ g/week women and $> 40$ g/week men) | 511   | 2.5%  |
| Hours of sleep        | > 9h / day                                                  | 1226  | 6.0%  |
|                       | 7-9 h / day                                                 | 14643 | 71.8% |
|                       | < 7 h / day                                                 | 4528  | 22.2% |
| Main daily activity   | Sitting for the most part                                   | 8161  | 40.0% |
|                       | Standing for the most part                                  | 9199  | 45.1% |
|                       | Tasks with some effort                                      | 3038  | 14.9% |
| Physical activity     | Sedentary                                                   | 9051  | 44.4% |
|                       | Occasional physical activity                                | 6735  | 33.0% |
|                       | Frequent physical activity                                  | 2668  | 13.1% |
|                       | Athletic training                                           | 1943  | 9.5%  |
| Breakfast             | At home                                                     | 17288 | 84.8% |
|                       | Away from home                                              | 2335  | 11.4% |
|                       | I don't usually eat breakfast                               | 774   | 3.8%  |
| Fruit intake          | Daily                                                       | 12427 | 60.9% |
|                       | $\geq 3$ servings a week                                    | 3957  | 19.4% |
|                       | 1-2 servings a week                                         | 2274  | 11.1% |
|                       | < 1 serving a week                                          | 787   | 3.9%  |
|                       | Rarely or never                                             | 953   | 4.7%  |
| Vegetable intake      | Daily                                                       | 9566  | 46.9% |
|                       | $\geq 3$ servings a week                                    | 6990  | 34.3% |
|                       | 1-2 servings a week                                         | 2761  | 13.5% |
|                       | < 1 serving a week                                          | 690   | 3.4%  |
|                       | Rarely or never                                             | 390   | 1.9%  |
| Intake of legumes     | Daily                                                       | 312   | 1.5%  |
|                       | $\geq 3$ servings a week                                    | 4738  | 23.2% |
|                       | 1-2 servings a week                                         | 12161 | 59.6% |
|                       | < 1 serving a week                                          | 2400  | 11.8% |
|                       | Rarely or never                                             | 786   | 3.9%  |
| Dairy intake          | Daily                                                       | 17231 | 84.5% |
|                       | $\geq 3$ servings a week                                    | 1557  | 7.6%  |
|                       | 1-2 servings a week                                         | 702   | 3.4%  |
|                       | < 1 serving a week                                          | 348   | 1.7%  |
|                       | Rarely or never                                             | 559   | 2.7%  |
| Sweets intake         | Daily                                                       | 5924  | 29.0% |
|                       | $\geq 3$ servings a week                                    | 3105  | 15.2% |
|                       | 1-2 servings a week                                         | 3708  | 18.2% |
|                       | < 1 serving a week                                          | 3278  | 16.1% |
|                       | Rarely or never                                             | 4382  | 21.5% |
| Fast food             | Daily                                                       | 360   | 1.8%  |
|                       | $\geq 3$ servings a week                                    | 919   | 4.5%  |
|                       | 1-2 servings a week                                         | 4078  | 20.0% |
|                       | < 1 serving a week                                          | 4861  | 23.8% |
|                       | Rarely or never                                             | 10180 | 49.9% |
| Dental hygiene        | 3 or more times a day                                       | 7758  | 38.0% |
|                       | 2 times / day                                               | 6738  | 33.0% |
|                       | 1 time / day                                                | 4034  | 19.8% |
|                       | Never or occasionally                                       | 1866  | 9.1%  |
| Self-perceived health | Very good                                                   | 4396  | 21.6% |
|                       | Good                                                        | 10413 | 51.0% |
|                       | Okay                                                        | 4065  | 19.9% |
|                       | Bad                                                         | 1224  | 6.0%  |
|                       | Very bad                                                    | 299   | 1.5%  |
| EuroQoL-5D EVA        | > 75 points                                                 | 13425 | 65.8% |
|                       | 50-75 points                                                | 5401  | 26.5% |
|                       | < 50 points                                                 | 1570  | 7.7%  |
| Some chronic illness  | No                                                          | 11823 | 58.0% |

|                            |                          |       |       |
|----------------------------|--------------------------|-------|-------|
|                            | Yes                      | 8574  | 42.0% |
| Hypertension               | No                       | 16119 | 79.0% |
|                            | Yes                      | 4278  | 21.0% |
| Myocardial infarction      | No                       | 19997 | 98.0% |
|                            | Yes                      | 400   | 2.0%  |
| Other heart diseases       | No                       | 19226 | 94.3% |
|                            | Yes                      | 1171  | 5.7%  |
| Varicose veins             | No                       | 18087 | 88.7% |
|                            | Yes                      | 2310  | 11.3% |
| Arthrosis or arthritis     | No                       | 16663 | 81.7% |
|                            | Yes                      | 3734  | 18.3% |
| Chronic neck pain          | No                       | 17053 | 83.6% |
|                            | Yes                      | 3344  | 16.4% |
| Chronic low back pain      | No                       | 16427 | 80.5% |
|                            | Yes                      | 3970  | 19.5% |
| Chronic allergy            | No                       | 17921 | 87.9% |
|                            | Yes                      | 2476  | 12.1% |
| Allergic asthma            | No                       | 19359 | 94.9% |
|                            | Yes                      | 1038  | 5.1%  |
| COPD                       | No                       | 19459 | 95.4% |
|                            | Yes                      | 938   | 4.6%  |
| Diabetes mellitus          | No                       | 18932 | 92.8% |
|                            | Yes                      | 1465  | 7.2%  |
| Gastrointestinal ulcer     | No                       | 19545 | 95.8% |
|                            | Yes                      | 852   | 4.2%  |
| Urinary incontinence       | No                       | 19710 | 96.6% |
|                            | Yes                      | 687   | 3.4%  |
| High cholesterol           | No                       | 16617 | 81.5% |
|                            | Yes                      | 3780  | 18.5% |
| Waterfalls                 | No                       | 18779 | 92.1% |
|                            | Yes                      | 1618  | 7.9%  |
| Skin problems              | No                       | 19432 | 95.3% |
|                            | Yes                      | 965   | 4.7%  |
| Constipation               | No                       | 19572 | 96.0% |
|                            | Yes                      | 825   | 4.0%  |
| Cirrhosis                  | No                       | 20195 | 99.0% |
|                            | Yes                      | 202   | 1.0%  |
| Depression                 | No                       | 18918 | 92.7% |
|                            | Yes                      | 1479  | 7.3%  |
| Anxiety                    | No                       | 18836 | 92.3% |
|                            | Yes                      | 1561  | 7.7%  |
| Mental health problems     | No                       | 20109 | 98.6% |
|                            | Yes                      | 288   | 1.4%  |
| Stroke                     | No                       | 20163 | 98.9% |
|                            | Yes                      | 234   | 1.1%  |
| Migraine                   | No                       | 18419 | 90.3% |
|                            | Yes                      | 1978  | 9.7%  |
| Hemorrhoids                | No                       | 19200 | 94.1% |
|                            | Yes                      | 1197  | 5.9%  |
| Malignant tumor            | No                       | 19822 | 97.2% |
|                            | Yes                      | 575   | 2.8%  |
| Osteoporosis               | No                       | 19570 | 95.9% |
|                            | Yes                      | 827   | 4.1%  |
| Thyroid problems           | No                       | 19324 | 94.7% |
|                            | Yes                      | 1073  | 5.3%  |
| Accident injuries          | No                       | 19300 | 94.6% |
|                            | Yes                      | 1097  | 5.4%  |
| Accidents in the last year | No                       | 18699 | 91.7% |
|                            | Yes                      | 1698  | 8.3%  |
| Mental health              | Psychopathology absence  | 17796 | 87.2% |
|                            | Suspicion                | 994   | 4.9%  |
|                            | Psychopathology presence | 1367  | 6.7%  |

|                                                      |                     |       |       |
|------------------------------------------------------|---------------------|-------|-------|
|                                                      | NA                  | 240   | 1.2%  |
| Limitation of physical activity in previous 2 weeks  | No                  | 18077 | 88.6% |
|                                                      | Yes                 | 2320  | 11.4% |
| Bed rest in previous 2 weeks                         | No                  | 19297 | 94.6% |
|                                                      | Yes                 | 1100  | 5.4%  |
| Limitation of physical activity in previous 6 months | Severely limited    | 672   | 3.3%  |
|                                                      | Limited not serious | 3238  | 15.9% |
|                                                      | Nothing limited     | 16487 | 80.8% |
| Glasses or contact lenses                            | No                  | 7953  | 39.0% |
|                                                      | Yes                 | 12444 | 61.0% |
| Hearing aids                                         | No                  | 19764 | 96.9% |
|                                                      | Yes                 | 633   | 3.1%  |
| Hospitalization in previous 12 months                | No                  | 18702 | 91.7% |
|                                                      | Yes                 | 1695  | 8.3%  |
| Primary care consult in previous month               | No                  | 14678 | 72.0% |
|                                                      | Yes                 | 5719  | 28.0% |
| Visits to other specialists                          | No                  | 17330 | 85.0% |
|                                                      | Yes                 | 3067  | 15.0% |
| Stay in day hospital in previous 12 months           | No                  | 18858 | 92.5% |
|                                                      | Yes                 | 1539  | 7.5%  |
| Visits to urgencies in previous 12 months            | No                  | 14926 | 73.2% |
|                                                      | Yes                 | 5471  | 26.8% |
| Physiotherapist in previous 12 months                | No                  | 18297 | 89.7% |
|                                                      | Yes                 | 2100  | 10.3% |
| Psychologist in previous 12 months                   | No                  | 19700 | 96.6% |
|                                                      | Yes                 | 697   | 3.4%  |
| Radiography in previous 12 months                    | No                  | 14831 | 72.7% |
|                                                      | Yes                 | 5566  | 27.3% |
| CT or scanner in previous 12 months                  | No                  | 18861 | 92.5% |
|                                                      | Yes                 | 1536  | 7.5%  |
| Ecography in previous 12 months                      | No                  | 17472 | 85.7% |
|                                                      | Yes                 | 2925  | 14.3% |
| MRI in previous 12 months                            | No                  | 18884 | 92.6% |
|                                                      | Yes                 | 1513  | 7.4%  |
| Flu vaccine                                          | No                  | 16610 | 81.4% |
|                                                      | Yes                 | 3787  | 18.6% |

CT: computed tomography; MRI: magnetic resonance imaging; NA: not available.

**Table S2.** Accumulated 6-year incidence rates for mortality from tumors and mortality from other causes according to demographic characteristics, other chronic pathologies, quality of life, and use of health services.

|                        |                       |            |       | Tumor mortality |      | Mortality other causes |       |         |
|------------------------|-----------------------|------------|-------|-----------------|------|------------------------|-------|---------|
|                        |                       | Alive<br>n | %     | n               | %    | n                      | %     | p-value |
| Autonomous communities | Andalusia             | 3431       | 93.8% | 68              | 1.9% | 160                    | 4.4%  | 0.043   |
|                        | Aragón                | 553        | 94.0% | 12              | 2.1% | 23                     | 3.9%  |         |
|                        | Asturias              | 447        | 92.1% | 12              | 2.4% | 27                     | 5.5%  |         |
|                        | Balearic Islands      | 453        | 94.9% | 3               | 0.6% | 22                     | 4.5%  |         |
|                        | Canary Islands        | 887        | 95.3% | 10              | 1.1% | 33                     | 3.6%  |         |
|                        | Cantabria             | 251        | 95.4% | 4               | 1.3% | 9                      | 3.3%  |         |
|                        | Castilla y León       | 1052       | 92.0% | 29              | 2.6% | 62                     | 5.4%  |         |
|                        | Castilla-La Mancha    | 863        | 94.0% | 16              | 1.7% | 39                     | 4.3%  |         |
|                        | Catalonia             | 2934       | 95.6% | 46              | 1.5% | 88                     | 2.9%  |         |
|                        | Valencian Community   | 2118       | 94.8% | 39              | 1.8% | 76                     | 3.4%  |         |
|                        | Extremadura           | 451        | 93.8% | 11              | 2.2% | 19                     | 4.0%  |         |
|                        | Galicia               | 1190       | 94.9% | 19              | 1.5% | 45                     | 3.6%  |         |
|                        | Madrid                | 2670       | 95.2% | 40              | 1.4% | 94                     | 3.4%  |         |
|                        | Murcia                | 622        | 95.7% | 6               | 0.9% | 22                     | 3.4%  |         |
|                        | Navarra               | 266        | 95.5% | 6               | 2.0% | 7                      | 2.5%  |         |
|                        | Basque Country        | 911        | 94.8% | 17              | 1.7% | 34                     | 3.5%  |         |
|                        | Rioja                 | 132        | 93.8% | 3               | 1.9% | 6                      | 4.3%  |         |
| Ceuta-Melilla          | 59                    | 96.3%      | 1     | 1.2%            | 2    | 2.5%                   |       |         |
| Sex                    | Male                  | 9349       | 94.0% | 208             | 2.1% | 386                    | 3.9%  | <0.001  |
|                        | Female                | 9941       | 95.1% | 132             | 1.3% | 382                    | 3.7%  |         |
| Age group (years)      | < 50                  | 11950      | 99.5% | 23              | 0.2% | 42                     | 0.4%  | <0.001  |
|                        | 50-59                 | 3015       | 97.1% | 59              | 1.9% | 32                     | 1.0%  |         |
|                        | 60-69                 | 2238       | 93.5% | 71              | 3.0% | 84                     | 3.5%  |         |
|                        | 70-79                 | 1492       | 84.4% | 89              | 5.0% | 187                    | 10.6% |         |
|                        | ≥ 80                  | 595        | 53.3% | 98              | 8.8% | 423                    | 37.9% |         |
| Social Class           | Social Class I        | 2091       | 95.7% | 31              | 1.4% | 63                     | 2.9%  | <0.001  |
|                        | Social Class II       | 1439       | 96.1% | 24              | 1.6% | 35                     | 2.3%  |         |
|                        | Social Class III      | 3466       | 95.1% | 65              | 1.8% | 115                    | 3.1%  |         |
|                        | Social Class IV       | 2869       | 94.2% | 62              | 2.0% | 116                    | 3.8%  |         |
|                        | Social Class V        | 6108       | 94.2% | 102             | 1.6% | 272                    | 4.2%  |         |
|                        | Social Class VI       | 2823       | 94.0% | 48              | 1.6% | 132                    | 4.4%  |         |
|                        | NA                    | 496        | 92.2% | 8               | 1.4% | 35                     | 6.4%  |         |
| Body mass index        | Normal                | 8721       | 96.7% | 103             | 1.1% | 195                    | 2.2%  | <0.001  |
|                        | Overweight            | 6450       | 94.8% | 134             | 2.0% | 220                    | 3.2%  |         |
|                        | Obese                 | 2922       | 92.9% | 57              | 1.8% | 165                    | 5.2%  |         |
|                        | NA                    | 1197       | 83.7% | 46              | 3.2% | 188                    | 13.1% |         |
| Country of Birth       | Spain                 | 16417      | 94.0% | 316             | 1.8% | 737                    | 4.2%  | <0.001  |
|                        | Foreign               | 2873       | 98.2% | 23              | 0.8% | 31                     | 1.1%  |         |
| Civil status           | Single                | 6449       | 98.1% | 34              | 0.5% | 89                     | 1.4%  | <0.001  |
|                        | Married               | 10810      | 94.8% | 220             | 1.9% | 367                    | 3.2%  |         |
|                        | Widower               | 1098       | 75.2% | 68              | 4.7% | 293                    | 20.1% |         |
|                        | Separated             | 347        | 95.5% | 8               | 2.2% | 8                      | 2.3%  |         |
|                        | Divorced              | 586        | 97.0% | 8               | 1.4% | 10                     | 1.6%  |         |
| Educational level      | University            | 3193       | 97.3% | 37              | 1.1% | 50                     | 1.5%  | <0.001  |
|                        | Professional training | 3074       | 98.3% | 25              | 0.8% | 28                     | 0.9%  |         |
|                        | Bachelor              | 2608       | 97.3% | 34              | 1.3% | 38                     | 1.4%  |         |
|                        | Secondary             | 6598       | 96.4% | 81              | 1.2% | 169                    | 2.5%  |         |
|                        | Primary or less       | 3816       | 85.5% | 163             | 3.6% | 483                    | 10.8% |         |
| Net monthly income     | NA                    | 5174       | 95.1% | 84              | 1.5% | 183                    | 3.4%  | <0.001  |
|                        | > 2251 €              | 3107       | 97.2% | 33              | 1.0% | 56                     | 1.7%  |         |
|                        | 1551-2250 €           | 3086       | 96.2% | 37              | 1.2% | 83                     | 2.6%  |         |
|                        | 1051-1550 €           | 3553       | 94.4% | 65              | 1.7% | 147                    | 3.9%  |         |
|                        | 801-1050 €            | 1943       | 93.6% | 33              | 1.6% | 100                    | 4.8%  |         |
|                        | < 800 €               | 2426       | 89.4% | 88              | 3.2% | 199                    | 7.3%  |         |

|                     |                               |       |       |     |      |     |       |        |
|---------------------|-------------------------------|-------|-------|-----|------|-----|-------|--------|
| Tobacco use         | Never smoker                  | 10280 | 94.3% | 149 | 1.4% | 478 | 4.4%  | <0.001 |
|                     | Ex-smoker                     | 3652  | 92.0% | 118 | 3.0% | 201 | 5.1%  |        |
|                     | Smoker                        | 5357  | 97.1% | 72  | 1.3% | 89  | 1.6%  |        |
| Exposure to tobacco | Never                         | 15274 | 94.0% | 296 | 1.8% | 680 | 4.2%  | <0.001 |
|                     | < 1h / day                    | 1508  | 96.3% | 21  | 1.4% | 37  | 2.4%  |        |
|                     | > 1h / day                    | 2508  | 97.2% | 22  | 0.9% | 50  | 1.9%  |        |
| Alcohol intake      | None                          | 10124 | 93.2% | 197 | 1.8% | 536 | 4.9%  | <0.001 |
|                     | Low risk ( $\leq 20/40$ g)    | 8679  | 96.1% | 134 | 1.5% | 216 | 2.4%  |        |
|                     | Risky drinking ( $> 20/40$ g) | 487   | 95.4% | 8   | 1.6% | 15  | 3.0%  |        |
| Hours of sleep      | > 9h / day                    | 1025  | 83.6% | 39  | 3.2% | 162 | 13.2% | <0.001 |
|                     | 7-9 h / day                   | 14030 | 95.8% | 204 | 1.4% | 409 | 2.8%  |        |
|                     | < 7 h / day                   | 4234  | 93.5% | 97  | 2.1% | 196 | 4.3%  |        |
| Main daily activity | Sitting for the most part     | 7351  | 90.1% | 199 | 2.4% | 610 | 7.5%  | <0.001 |
|                     | Standing for the most part    | 8958  | 97.4% | 115 | 1.2% | 126 | 1.4%  |        |
|                     | Tasks with some effort        | 2980  | 98.1% | 26  | 0.8% | 31  | 1.0%  |        |
| Physical activity   | Sedentary                     | 8267  | 91.3% | 203 | 2.2% | 581 | 6.4%  | <0.001 |
|                     | Occasional physical activity  | 6465  | 96.0% | 119 | 1.8% | 151 | 2.2%  |        |
|                     | Frequent physical activity    | 2641  | 99.0% | 10  | 0.4% | 17  | 0.6%  |        |
|                     | Athletic training             | 1916  | 98.6% | 9   | 0.4% | 18  | 0.9%  |        |
| Breakfast           | At home                       | 16243 | 94.0% | 322 | 1.9% | 723 | 4.2%  | <0.001 |
|                     | Away from home                | 2287  | 98.0% | 12  | 0.5% | 35  | 1.5%  |        |
|                     | I don't usually eat breakfast | 760   | 98.1% | 6   | 0.8% | 9   | 1.1%  |        |
| Fruit intake        | Daily                         | 11655 | 93.8% | 225 | 1.8% | 547 | 4.4%  | <0.001 |
|                     | $\geq 3$ servings a week      | 3774  | 95.4% | 64  | 1.6% | 118 | 3.0%  |        |
|                     | 1-2 servings a week           | 2185  | 96.1% | 27  | 1.2% | 61  | 2.7%  |        |
|                     | < 1 serving a week            | 761   | 96.8% | 11  | 1.4% | 15  | 1.9%  |        |
|                     | Rarely or never               | 914   | 95.9% | 13  | 1.3% | 26  | 2.7%  |        |
| Vegetable intake    | Daily                         | 9053  | 94.6% | 143 | 1.5% | 371 | 3.9%  | 0.188  |
|                     | $\geq 3$ servings a week      | 6595  | 94.3% | 135 | 1.9% | 260 | 3.7%  |        |
|                     | 1-2 servings a week           | 2622  | 95.0% | 48  | 1.7% | 91  | 3.3%  |        |
|                     | < 1 serving a week            | 657   | 95.2% | 9   | 1.2% | 24  | 3.5%  |        |
|                     | Rarely or never               | 363   | 93.0% | 6   | 1.4% | 22  | 5.5%  |        |
| Intake of legumes   | Daily                         | 298   | 95.5% | 4   | 1.2% | 10  | 3.3%  | 0.076  |
|                     | $\geq 3$ servings a week      | 4449  | 93.9% | 86  | 1.8% | 203 | 4.3%  |        |
|                     | 1-2 servings a week           | 11515 | 94.7% | 200 | 1.6% | 446 | 3.7%  |        |
|                     | < 1 serving a week            | 2290  | 95.4% | 41  | 1.7% | 69  | 2.9%  |        |
|                     | Rarely or never               | 737   | 93.8% | 10  | 1.2% | 39  | 5.0%  |        |
| Dairy intake        | Daily                         | 16281 | 94.5% | 291 | 1.7% | 659 | 3.8%  | 0.045  |
|                     | $\geq 3$ servings a week      | 1487  | 95.5% | 20  | 1.3% | 50  | 3.2%  |        |
|                     | 1-2 servings a week           | 677   | 96.3% | 5   | 0.7% | 21  | 2.9%  |        |
|                     | < 1 serving a week            | 328   | 94.2% | 7   | 2.1% | 13  | 3.7%  |        |
|                     | Rarely or never               | 517   | 92.5% | 17  | 3.0% | 25  | 4.5%  |        |
| Sweets intake       | Daily                         | 5587  | 94.3% | 95  | 1.6% | 243 | 4.1%  | <0.001 |
|                     | $\geq 3$ servings a week      | 2977  | 95.9% | 36  | 1.2% | 91  | 2.9%  |        |
|                     | 1-2 servings a week           | 3532  | 95.3% | 56  | 1.5% | 120 | 3.2%  |        |
|                     | < 1 serving a week            | 3134  | 95.6% | 55  | 1.7% | 89  | 2.7%  |        |
|                     | Rarely or never               | 4060  | 92.6% | 97  | 2.2% | 225 | 5.1%  |        |
| Fast food           | Daily                         | 358   | 99.6% | 0   | 0.0% | 1   | 0.4%  | <0.001 |
|                     | $\geq 3$ servings a week      | 904   | 98.4% | 5   | 0.5% | 10  | 1.1%  |        |
|                     | 1-2 servings a week           | 4017  | 98.5% | 23  | 0.6% | 37  | 0.9%  |        |
|                     | < 1 serving a week            | 4764  | 98.0% | 40  | 0.8% | 57  | 1.2%  |        |
|                     | Rarely or never               | 9246  | 90.8% | 272 | 2.7% | 662 | 6.5%  |        |
| Dental hygiene      | 3 or more times a day         | 7523  | 97.0% | 87  | 1.1% | 148 | 1.9%  | <0.001 |
|                     | 2 times / day                 | 6449  | 95.7% | 99  | 1.5% | 190 | 2.8%  |        |
|                     | 1 time / day                  | 3731  | 92.5% | 93  | 2.3% | 210 | 5.2%  |        |
|                     | Never or occasionally         | 1587  | 85.1% | 60  | 3.2% | 219 | 11.7% |        |

|                        |              |       |       |     |      |     |       |        |
|------------------------|--------------|-------|-------|-----|------|-----|-------|--------|
| Self-perceived health  | Very good    | 4353  | 99.0% | 18  | 0.4% | 26  | 0.6%  | <0.001 |
|                        | Good         | 10116 | 97.1% | 114 | 1.1% | 183 | 1.8%  |        |
|                        | Okay         | 3651  | 89.8% | 122 | 3.0% | 293 | 7.2%  |        |
|                        | Bad          | 966   | 78.9% | 64  | 5.2% | 195 | 15.9% |        |
|                        | Very bad     | 204   | 68.4% | 23  | 7.5% | 72  | 24.0% |        |
| EuroQoL-5D EVA         | > 75 points  | 13132 | 97.8% | 123 | 0.9% | 170 | 1.3%  | <0.001 |
|                        | 50-75 points | 4946  | 91.6% | 136 | 2.5% | 319 | 5.9%  |        |
|                        | < 50 points  | 1212  | 77.2% | 80  | 5.1% | 278 | 17.7% |        |
| Some chronic illness   | No           | 11578 | 97.9% | 101 | 0.9% | 144 | 1.2%  | <0.001 |
|                        | Yes          | 7712  | 89.9% | 239 | 2.8% | 623 | 7.3%  |        |
| Hypertension           | No           | 15566 | 96.6% | 191 | 1.2% | 362 | 2.2%  | <0.001 |
|                        | Yes          | 3724  | 87.0% | 148 | 3.5% | 406 | 9.5%  |        |
| Myocardial infarction  | No           | 19007 | 95.1% | 311 | 1.6% | 679 | 3.4%  | <0.001 |
|                        | Yes          | 283   | 70.7% | 29  | 7.2% | 89  | 22.1% |        |
| Other heart diseases   | No           | 18382 | 95.6% | 301 | 1.6% | 544 | 2.8%  | <0.001 |
|                        | Yes          | 908   | 77.6% | 39  | 3.3% | 223 | 19.1% |        |
| Varicose veins         | No           | 17200 | 95.1% | 287 | 1.6% | 599 | 3.3%  | <0.001 |
|                        | Yes          | 2090  | 90.5% | 52  | 2.3% | 168 | 7.3%  |        |
| Arthrosis or arthritis | No           | 16101 | 96.6% | 209 | 1.3% | 353 | 2.1%  | <0.001 |
|                        | Yes          | 3189  | 85.4% | 131 | 3.5% | 414 | 11.1% |        |
| Chronic neck pain      | No           | 16252 | 95.3% | 259 | 1.5% | 542 | 3.2%  | <0.001 |
|                        | Yes          | 3038  | 90.9% | 81  | 2.4% | 225 | 6.7%  |        |
| Chronic low back pain  | No           | 15682 | 95.5% | 243 | 1.5% | 503 | 3.1%  | <0.001 |
|                        | Yes          | 3608  | 90.9% | 97  | 2.4% | 264 | 6.7%  |        |
| Chronic allergy        | No           | 16899 | 94.3% | 306 | 1.7% | 716 | 4.0%  | <0.001 |
|                        | Yes          | 2391  | 96.6% | 34  | 1.4% | 51  | 2.1%  |        |
| Asthma                 | No           | 18337 | 94.7% | 316 | 1.6% | 706 | 3.6%  | <0.001 |
|                        | Yes          | 953   | 91.8% | 23  | 2.2% | 61  | 5.9%  |        |
| COPD                   | No           | 18552 | 95.3% | 291 | 1.5% | 617 | 3.2%  | <0.001 |
|                        | Yes          | 738   | 78.7% | 49  | 5.2% | 151 | 16.1% |        |
| Diabetes mellitus      | No           | 18092 | 95.6% | 281 | 1.5% | 559 | 3.0%  | <0.001 |
|                        | Yes          | 1198  | 81.8% | 58  | 4.0% | 208 | 14.2% |        |
| Gastrointestinal ulcer | No           | 18534 | 94.8% | 312 | 1.6% | 699 | 3.6%  | <0.001 |
|                        | Yes          | 756   | 88.7% | 28  | 3.2% | 69  | 8.1%  |        |
| Urinary incontinence   | No           | 18815 | 95.5% | 298 | 1.5% | 597 | 3.0%  | <0.001 |
|                        | Yes          | 475   | 69.1% | 42  | 6.1% | 170 | 24.8% |        |
| High cholesterol       | No           | 15828 | 95.3% | 232 | 1.4% | 556 | 3.3%  | <0.001 |
|                        | Yes          | 3462  | 91.6% | 107 | 2.8% | 211 | 5.6%  |        |
| Waterfalls             | No           | 18067 | 96.2% | 246 | 1.3% | 466 | 2.5%  | <0.001 |
|                        | Yes          | 1223  | 75.6% | 94  | 5.8% | 301 | 18.6% |        |
| Skin problems          | No           | 18408 | 94.7% | 319 | 1.6% | 705 | 3.6%  | <0.001 |
|                        | Yes          | 882   | 91.4% | 21  | 2.1% | 63  | 6.5%  |        |
| Constipation           | No           | 18588 | 95.0% | 308 | 1.6% | 676 | 3.5%  | <0.001 |
|                        | Yes          | 702   | 85.1% | 32  | 3.8% | 92  | 11.1% |        |
| Cirrhosis              | No           | 19126 | 94.7% | 326 | 1.6% | 743 | 3.7%  | <0.001 |
|                        | Yes          | 163   | 80.8% | 14  | 6.9% | 25  | 12.3% |        |
| Depression             | No           | 17986 | 95.1% | 296 | 1.6% | 636 | 3.4%  | <0.001 |
|                        | Yes          | 1304  | 88.2% | 44  | 3.0% | 131 | 8.9%  |        |
| Anxiety                | No           | 17858 | 94.8% | 305 | 1.6% | 673 | 3.6%  | <0.001 |
|                        | Yes          | 1431  | 91.7% | 35  | 2.2% | 95  | 6.1%  |        |
| Mental health problems | No           | 19098 | 95.0% | 326 | 1.6% | 684 | 3.4%  | <0.001 |
|                        | Yes          | 192   | 66.5% | 13  | 4.6% | 83  | 28.9% |        |

|                                                      |                          |       |       |     |       |     |       |        |
|------------------------------------------------------|--------------------------|-------|-------|-----|-------|-----|-------|--------|
| Stroke                                               | No                       | 19133 | 94.9% | 328 | 1.6%  | 702 | 3.5%  | <0.001 |
|                                                      | Yes                      | 157   | 67.0% | 12  | 5.1%  | 65  | 27.9% |        |
| Migraine                                             | No                       | 17413 | 94.5% | 310 | 1.7%  | 695 | 3.8%  | 0.736  |
|                                                      | Yes                      | 1877  | 94.9% | 29  | 1.5%  | 72  | 3.6%  |        |
| Hemorrhoids                                          | No                       | 18199 | 94.8% | 316 | 1.6%  | 685 | 3.6%  | <0.001 |
|                                                      | Yes                      | 1091  | 91.2% | 24  | 2.0%  | 82  | 6.9%  |        |
| Malignant tumor                                      | No                       | 18852 | 95.1% | 260 | 1.3%  | 709 | 3.6%  | <0.001 |
|                                                      | Yes                      | 438   | 76.1% | 79  | 13.8% | 58  | 10.2% |        |
| Osteoporosis                                         | No                       | 18606 | 95.1% | 307 | 1.6%  | 657 | 3.4%  | <0.001 |
|                                                      | Yes                      | 684   | 82.7% | 33  | 4.0%  | 110 | 13.3% |        |
| Thyroid problems                                     | No                       | 18281 | 94.6% | 323 | 1.7%  | 720 | 3.7%  | 0.499  |
|                                                      | Yes                      | 1009  | 94.1% | 16  | 1.5%  | 47  | 4.4%  |        |
| Accident injuries                                    | No                       | 18265 | 94.6% | 316 | 1.6%  | 719 | 3.7%  | 0.201  |
|                                                      | Yes                      | 1025  | 93.4% | 24  | 2.1%  | 48  | 4.4%  |        |
| Accidents in the last year                           | No                       | 17700 | 94.7% | 316 | 1.7%  | 684 | 3.7%  | 0.021  |
|                                                      | Yes                      | 1590  | 93.6% | 24  | 1.4%  | 84  | 4.9%  |        |
| Mental health                                        | Psychopathology absence  | 17007 | 95.6% | 265 | 1.5%  | 524 | 2.9%  | <0.001 |
|                                                      | Suspicion                | 930   | 93.6% | 20  | 2.0%  | 44  | 4.4%  |        |
|                                                      | Psychopathology presence | 1184  | 86.6% | 49  | 3.6%  | 134 | 9.8%  |        |
|                                                      | NA                       | 169   | 70.3% | 6   | 2.6%  | 65  | 27.1% |        |
| Limitation of physical activity in previous 2 weeks  | No                       | 17266 | 95.5% | 254 | 1.4%  | 557 | 3.1%  | <0.001 |
|                                                      | Yes                      | 2024  | 87.2% | 86  | 3.7%  | 210 | 9.1%  |        |
| Bed rest in previous 2 weeks                         | No                       | 18346 | 95.1% | 299 | 1.5%  | 652 | 3.4%  | <0.001 |
|                                                      | Yes                      | 944   | 85.8% | 41  | 3.7%  | 115 | 10.5% |        |
| Limitation of physical activity in previous 6 months | Severely limited         | 430   | 64.0% | 45  | 6.7%  | 197 | 29.3% | <0.001 |
|                                                      | Limited not serious      | 2866  | 88.5% | 114 | 3.5%  | 258 | 8.0%  |        |
|                                                      | Nothing limited          | 15994 | 97.0% | 181 | 1.1%  | 312 | 1.9%  |        |
| Glasses or contact lenses                            | No                       | 7721  | 97.1% | 58  | 0.7%  | 174 | 2.2%  | <0.001 |
|                                                      | Yes                      | 11569 | 93.0% | 282 | 2.3%  | 593 | 4.8%  |        |
| Hearing aids                                         | No                       | 18763 | 94.9% | 323 | 1.6%  | 677 | 3.4%  | <0.001 |
|                                                      | Yes                      | 527   | 83.1% | 17  | 2.7%  | 90  | 14.2% |        |
| Hospitalization in previous 12 months                | No                       | 17855 | 95.5% | 266 | 1.4%  | 580 | 3.1%  | <0.001 |
|                                                      | Yes                      | 1435  | 84.6% | 73  | 4.3%  | 187 | 11.0% |        |
| Primary care consult in previous month               | No                       | 14085 | 96.0% | 190 | 1.3%  | 403 | 2.7%  | <0.001 |
|                                                      | Yes                      | 5205  | 91.0% | 150 | 2.6%  | 364 | 6.4%  |        |
| Visits to other specialists                          | No                       | 16497 | 95.2% | 250 | 1.4%  | 583 | 3.4%  | <0.001 |
|                                                      | Yes                      | 2793  | 91.1% | 89  | 2.9%  | 184 | 6.0%  |        |
| Stay in day hospital in previous 12 months           | No                       | 17901 | 94.9% | 287 | 1.5%  | 670 | 3.6%  | <0.001 |
|                                                      | Yes                      | 1389  | 90.3% | 53  | 3.4%  | 97  | 6.3%  |        |
| Visits to urgencies in previous 12 months            | No                       | 14236 | 95.4% | 234 | 1.6%  | 456 | 3.1%  | <0.001 |



|                                       |     |       |       |     |      |     |       |        |
|---------------------------------------|-----|-------|-------|-----|------|-----|-------|--------|
|                                       | Yes | 5054  | 92.4% | 106 | 1.9% | 311 | 5.7%  |        |
| Physiotherapist in previous 12 months | No  | 17264 | 94.4% | 317 | 1.7% | 716 | 3.9%  | <0.001 |
|                                       | Yes | 2026  | 96.5% | 22  | 1.1% | 52  | 2.5%  |        |
| Psychologist in previous 12 months    | No  | 18634 | 94.6% | 333 | 1.7% | 733 | 3.7%  | 0.116  |
|                                       | Yes | 656   | 94.1% | 7   | 1.0% | 34  | 4.9%  |        |
| Radiography in previous 12 months     | No  | 14173 | 95.6% | 203 | 1.4% | 455 | 3.1%  | <0.001 |
|                                       | Yes | 5117  | 91.9% | 137 | 2.5% | 312 | 5.6%  |        |
| CT or scanner in previous 12 months   | No  | 17976 | 95.3% | 255 | 1.3% | 630 | 3.3%  | <0.001 |
|                                       | Yes | 1314  | 85.5% | 85  | 5.5% | 137 | 8.9%  |        |
| Ecography in previous 12 months       | No  | 16594 | 95.0% | 243 | 1.4% | 634 | 3.6%  | <0.001 |
|                                       | Yes | 2696  | 92.2% | 96  | 3.3% | 133 | 4.5%  |        |
| MRI in previous 12 months             | No  | 17926 | 94.9% | 279 | 1.5% | 679 | 3.6%  | <0.001 |
|                                       | Yes | 1364  | 90.1% | 61  | 4.0% | 88  | 5.8%  |        |
| Flu vaccine                           | No  | 16123 | 97.1% | 185 | 1.1% | 302 | 1.8%  | <0.001 |
|                                       | Yes | 3167  | 83.6% | 154 | 4.1% | 466 | 12.3% |        |

CT: computed tomography; MRI: magnetic resonance imaging; NA: not available.
